# 1 Estimating the epidemic reproduction number from temporally aggregated incidence data: a statistical 2 modelling approach and software tool

3  
4 Rebecca K Nash<sup>1</sup> MSc, Anne Cori<sup>1</sup> PhD\*, Pierre Nouvellet<sup>1,2</sup> PhD\*

5 \*Contributed equally

6 <sup>1</sup>MRC Centre for Global Infectious Disease Analysis, Jameel Institute, School of Public Health, Imperial College  
7 London

8 <sup>2</sup>School of Life Sciences, University of Sussex  
9

## 10 11 Background

12 The time-varying reproduction number ( $R_t$ ) is an important measure of epidemic transmissibility; it can directly  
13 inform policy decisions and the optimisation of control measures. EpiEstim is a widely used software tool that  
14 uses case incidence and the serial interval (SI, time between symptoms in a case and their infector) to estimate  
15  $R_t$  in real-time. The incidence and the SI distribution must be provided at the same temporal resolution, which  
16 limits the applicability of EpiEstim and other similar methods, e.g. for pathogens with a mean SI shorter than  
17 the frequency of incidence reporting.

## 18 Methods

19 We use an expectation-maximisation algorithm to reconstruct daily incidence from temporally aggregated  
20 data, from which  $R_t$  can then be estimated using EpiEstim. We assess the validity of our method using an  
21 extensive simulation study and apply it to COVID-19 and influenza data. The method is implemented in the  
22 opensource R package EpiEstim.

## 23 Findings

24 For all datasets, the influence of intra-weekly variability in reported data was mitigated by using aggregated  
25 weekly data.  $R_t$  estimated on weekly sliding windows using incidence reconstructed from weekly data was  
26 strongly correlated with estimates from the original daily data. The simulation study revealed that  $R_t$  was well  
27 estimated in all scenarios and regardless of the temporal aggregation of the data. In the presence of weekend  
28 effects,  $R_t$  estimates from reconstructed data were more successful at recovering the true value of  $R_t$  than  
29 those obtained from reported daily data.

## 30 Interpretation

31  $R_t$  can be successfully recovered from aggregated data, and estimation accuracy can even be improved by  
32 smoothing out administrative noise in the reported data.

## 33 Funding

34 MRC doctoral training partnership, MRC centre for global infectious disease analysis, the NIHR HPRU in  
35 Modelling and Health Economics, and the Academy of Medical Sciences Springboard, funded by the AMS,  
36 Wellcome Trust, BEIS, the British Heart Foundation and Diabetes UK.  
37

## 38 Introduction

39  
40 As infectious disease outbreaks become more common, it is increasingly important to rapidly characterise the  
41 threat of emerging and re-emerging pathogens.<sup>1</sup> Transmissibility, i.e. a pathogen's ability to spread through a  
42 population, can be quantified using the time-varying reproduction number,  $R_t$ , defined as the average number  
43 of infections that are caused by a primary case at time  $t$  of an outbreak.  $R_t$  signals whether an outbreak is  
44 growing ( $R_t > 1$ ) or declining ( $R_t < 1$ ), and whether current interventions are sufficient to control the spread of  
45 the disease.

**NOTE:** This preprint reports new research that has not been certified by peer review and should not be used to guide clinical practice.

46

47 One of the most popular tools for real-time  $R_t$  estimation, the R package EpiEstim, relies on observing the  
48 incidence data and supplying an estimated serial interval (SI) distribution – the time between symptom onset  
49 in a case and their infector. EpiEstim requires that the SI distribution and incidence data are supplied using  
50 the same time units. This can be problematic when daily incidence data is not reported, which is common for  
51 many diseases, such as influenza, Zika virus disease, and most notifiable diseases in countries such as the UK  
52 and the US.<sup>2-5</sup> Additionally, several studies intentionally aggregate data to reduce the impact of daily reporting  
53 variability; administrative noise, such as “weekend effects”, are characterised by a drop in reported cases over  
54 weekends, due to reduced care seeking and longer delays in reporting, followed by a peak on Mondays.<sup>6,7</sup> A  
55 commonly used workaround is to aggregate the SI distribution to match the frequency of incidence  
56 reporting,<sup>8,9</sup> however this is not possible if the SI is shorter than the aggregation of data. For example,  
57 influenza-like illness is typically reported on a weekly basis, but influenza has an estimated mean SI of 2-4  
58 days.<sup>10,11</sup> Similarly, reporting of COVID-19, which has an estimated SI of 3-7 days, has typically moved from  
59 daily to weekly.<sup>12,13</sup> Therefore, enabling estimation of  $R_t$  from temporally aggregated data is critical to ensure  
60 methods such as EpiEstim are widely applicable.<sup>14</sup>

61

62 In this study, we combine an expectation-maximisation (EM) algorithm with the renewal equation approach  
63 implemented in EpiEstim to reconstruct daily incidence from aggregated data and estimate  $R_t$ . We assess the  
64 performance of the method using influenza and COVID-19 data, in addition to an extensive simulation study.

65

## 66 **Methods**

67

### 68 *EpiEstim*

69

70 EpiEstim uses the renewal equation (eq.1), a form of branching process model.<sup>15</sup> In this formulation, the  
71 incidence of new symptomatic cases at time  $t$  ( $I_t$ ) is approximated by a Poisson process, where  $I_{t-s}$  is the past  
72 incidence, and  $g_s$  is the probability mass function of the serial interval.

73

$$I_t \sim Pois \left( R_t \sum_{s=1}^t I_{t-s} g_s \right) \quad (1)$$

74

75 With EpiEstim,  $R_t$  can be assumed to remain constant within user defined time windows, which smooth out  
76 estimates.

77

### 78 *Extending EpiEstim for coarsely aggregated data*

79

80 We extended EpiEstim to estimate  $R_t$  from aggregated incidence data ( $I_w$ ), where each aggregation window  
81 ( $w$ ) is  $>1$  day, whilst still conditioning on an assumed serial interval distribution ( $g_s$ ). We use an EM algorithm  
82 to iteratively reconstruct daily incidence ( $I_t$ ) from  $I_w$ , and in turn estimate  $R_t$ . We present the method with  
83 weekly data in mind, but the method and software can be applied to any temporal aggregation (Figure 1 &  
84 appendix pp22-24). The algorithm involves three steps: initialisation, expectation, and maximisation.

85

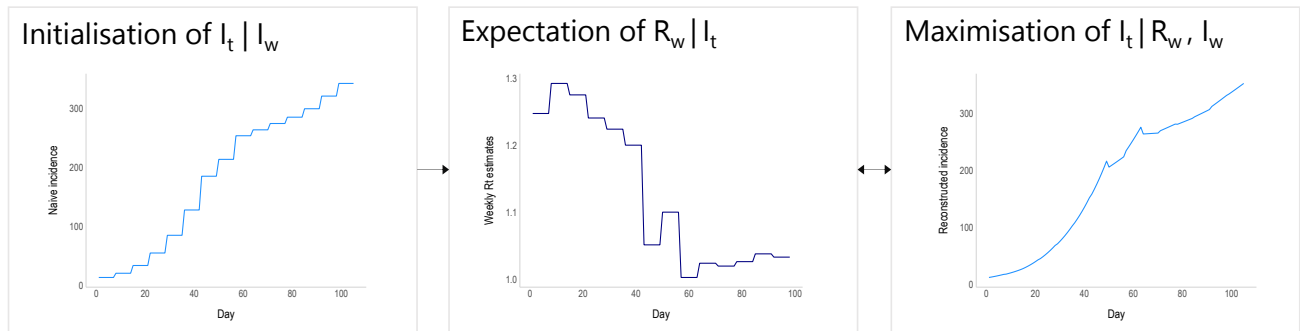

86

87

88

89

90

91

92

93

94

95

96

97

98

99

100

101

102

103

104

105

106

107

108

109

110

111

112

113

114

115

116

Figure 1. Schematic of the EM algorithm approach used to reconstruct daily incidence ( $I_t$ ) from weekly aggregated incidence data ( $I_w$ ). The algorithm is initialised with a naive disaggregation of the weekly incidence (assuming constant daily incidence throughout the aggregation window). The resulting daily incidence is then used to estimate the reproduction number for each aggregation window, in this case for each week,  $R_w$ .  $R_w$  is converted into a growth rate (see eq. 2), which is in turn used to reconstruct daily incidence data, whilst ensuring that if  $I_t$  were to be reaggreated it would still sum to the original weekly totals. The process cycles between the expectation and maximisation steps until convergence.

### Initialisation

The algorithm is initialised with naively disaggregated incidence data. For weekly data, the total incidence for each week is split evenly over 7 days (allowing for non-integers).

### Expectation

The current reconstructed  $I_t$  is used to estimate the expected reproduction number for each aggregation window,  $R_w$ , obtained as the posterior mean from EpiEstim.<sup>16</sup>

### Maximisation

Conditional on  $R_w$ , we reconstruct the most likely  $I_t$ . First,  $R_w$  is translated into a daily growth rate for that week ( $r_w$ ), using Wallinga and Lipsitch's method:<sup>17</sup>

$$R_w = \frac{1}{\sum_{s=0}^{+\infty} e^{-r_w s} g(s)} \quad (2)$$

$I_t$  for that week is then computed assuming exponential growth, with a multiplying constant  $k_w$  ensuring that when reaggreated, the reconstructed  $I_t$  matches the original  $I_w$ :

$$I_t = k_w \exp(r_w a_t) \quad (3)$$

$$k_w = \frac{I_w}{\sum_{n=1}^7 \exp(r_w n)} \quad (4)$$

where  $t$  is time (in days) and  $a_t$  is an index representing the day of the aggregation window, e.g. taking values 1 to 7.

The process is repeated iteratively until convergence, at which point  $I_t$  can be used to estimate the full posterior distribution of  $R_t$  using EpiEstim. For this final step,  $R_t$  can be estimated on any time window.

117  
118  
119  
120  
121  
122  
123  
124  
125  
126  
127  
128  
129  
130  
131  
132  
133  
134  
135  
136  
137  
138  
139  
140  
141  
142  
143  
144  
145  
146  
147  
148  
149  
150  
151  
152  
153  
154  
155  
156  
157  
158  
159  
160  
161

### *Case studies*

We chose datasets where incidence data was available daily, and then artificially aggregated them to weekly counts.  $R_t$  was estimated from daily incidence that was reconstructed from weekly aggregated data using our new approach, and compared to  $R_t$  estimates obtained from the reported daily incidence using the original EpiEstim R package. All  $R_t$  estimates were made using both daily and weekly sliding time windows, and we refer to those estimates as daily  $R_t$  estimates and weekly  $R_t$  estimates respectively.

We considered three characteristics: 1) mean  $R_t$  estimates, 2) uncertainty in the  $R_t$  estimates, and 3) the classification of  $R_t$  as increasing, uncertain or declining (appendix pp8-9). To compare the performance of this approach to the original method, we assessed the correlations between each of the three characteristics when using the reported and reconstructed incidence.

The priors for  $R_w$  and  $R_t$  were set to a mean and standard deviation of 5.

#### *Influenza*

We obtained a five-week subset of a dataset (11<sup>th</sup> December 2009 – 14<sup>th</sup> January 2010) on US active component military personnel (employed by the military as their full-time occupation) that made an outpatient visit to a permanent military treatment facility describing a respiratory-related illness. This daily incidence by date of presentation at a clinic was originally obtained by Riley et al. from the Armed Forces Health Surveillance Center and were digitally extracted for use here.<sup>18</sup> We used a mean SI of 3.6 days and SD of 1.6 days.<sup>10</sup>

#### *COVID-19*

Incidence of UK COVID-19 cases and deaths were taken from the UK government website.<sup>19</sup> For COVID-19 cases, we obtained ninety-seven weeks of data (21<sup>st</sup> February 2020 to 30<sup>th</sup> December 2021) for incidence by date of specimen, which is the date that a sample was taken from an individual which later tested positive. For COVID-19 deaths, we used ninety-six weeks of data (2<sup>nd</sup> March 2020 to 2<sup>nd</sup> January 2022) for incidence by date of death within twenty-eight days of a positive test. We assumed a mean SI of 6.1 days and SD of 4.2 days.<sup>12</sup>

### *Simulation study*

We considered scenarios where  $R_t$  either remained constant or varied over time, with a stepwise or gradual change. For each scenario, one hundred seventy-day epidemic trajectories were simulated using a Poisson branching process as implemented in the R package projections.<sup>20</sup> Daily datasets were aggregated weekly and used to estimate  $R_t$  using the proposed method; these values were compared to  $R_t$  estimates obtained from simulated daily data using the original EpiEstim R package. We explored the impact of weekend effects on  $R_t$  estimates, the ability to supply alternative temporal aggregations of data e.g., three-day, ten-day, or two-weekly aggregations, and finally, the number of iterations required to reach convergence when reconstructing daily incidence data. The full simulation study description and details can be found in the appendix.

### *Role of funding source*

162 The funders of the study had no role in the study design, data collection, data analysis, data interpretation,  
163 or writing of the report.

164

165 Results

166

167 Hereafter, we refer to reported and reconstructed incidence data, these are the reported daily incidence  
168 and the daily incidence that has been reconstructed from weekly aggregated data, respectively.

169

170 *Influenza*

171

172 The reconstructed incidence of influenza was much smoother than the reported incidence, which showed  
173 clear weekend effects and lower reported cases on two public holidays, both occurring on Fridays (Figure 2A  
174 & appendix p8). Considering weekly sliding  $R_t$  first, there was a high correlation in both the mean  $R_t$  estimates  
175 derived from each dataset ( $R^2 = 0.91$ , Figure 2C & appendix p2) and their associated uncertainty ( $R^2 = 0.93$  &  
176 Figure 2C). The overall agreement in the classification of  $R_t$  reached 81.8% (see methods & appendix p9).

177

178 In contrast, mean daily  $R_t$  estimates differed markedly depending on whether the reported or reconstructed  
179 data were used, with an  $R^2$  of 0.13 and much higher mean  $R_t$  and uncertainty in estimates obtained from  
180 reported data (Figure 2E-F). Higher mean  $R_t$  estimates coincided with large peaks in the reported daily  
181 incidence (typically on Mondays), as daily  $R_t$  estimates were not smoothed and therefore more affected by  
182 intra-weekly variability (appendix p2). The overall agreement in the classification of daily  $R_t$  estimates was  
183 much lower, with only 44.4% agreement (appendix p9).

184

185 In this case study, the greatest differences in  $R_t$  estimates tended to correspond to time periods when the  
186 reported and reconstructed incidence data were most dissimilar (Figure 2B & appendix p3). There was no  
187 apparent pattern in the estimates with regard to the outbreak phase, i.e. early, mid or late-phase, but this is  
188 likely due to this dataset being a snapshot of incidence taken from within an established epidemic (Figure 2).

189

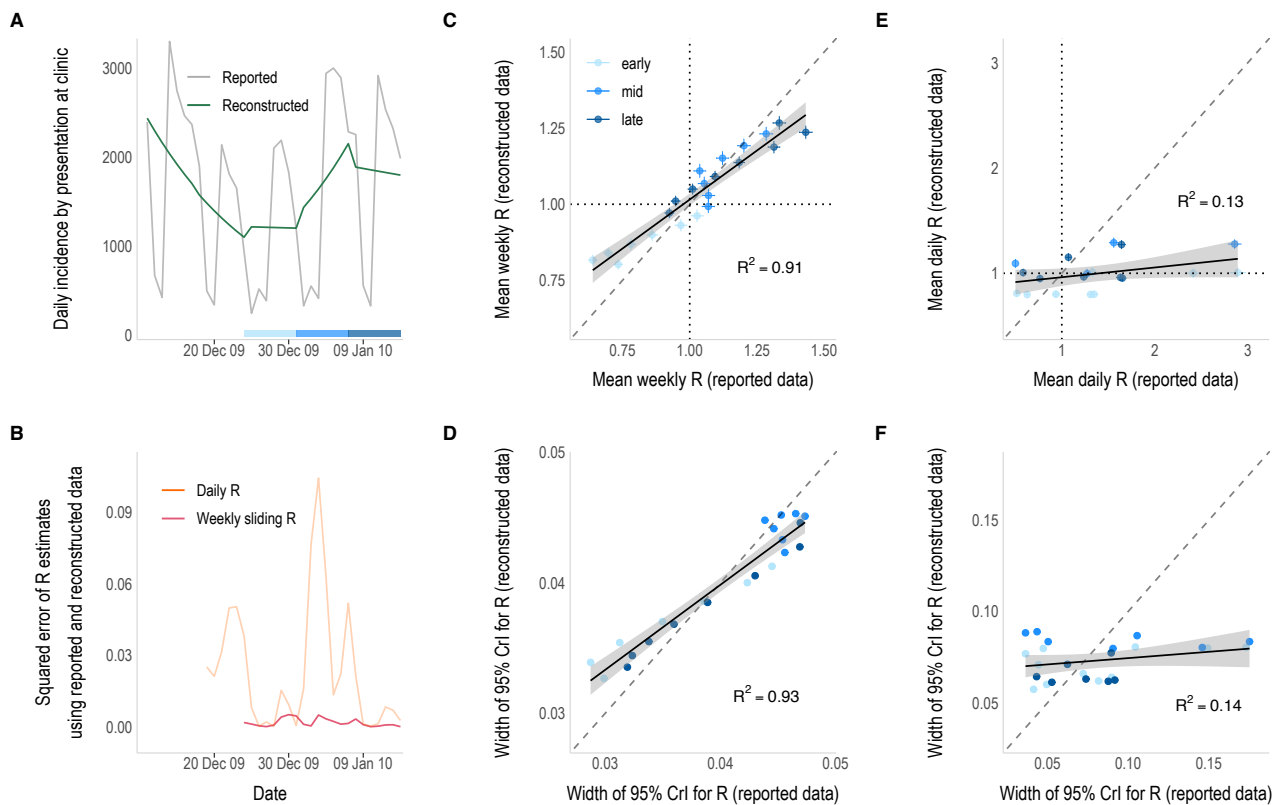

190  
191

192 Figure 2.  $R_t$  estimates from daily incidence that was either reported or reconstructed from weekly aggregated  
193 influenza data. A) The reported (grey) and reconstructed (green) daily incidence of influenza by date of  
194 presentation at a military clinic. B) Squared error of the daily (orange) and weekly sliding (pink)  $R_t$  estimates  
195 that were made from reconstructed daily data compared to those obtained from the reported daily data.  $R_t$   
196 estimation starts on the first day of the second aggregation window (day 8 – 18<sup>th</sup> December 2009) and is  
197 plotted on the last day of the time window used for estimation (i.e., starting on day 9 (19<sup>th</sup> December) for daily  
198 estimates and day 14 (24<sup>th</sup> December) for weekly estimates). Note: the x-axis is shared with the incidence plot  
199 above. C & E) Correlation between the weekly sliding (C) and daily (E) mean  $R_t$  estimates using reconstructed  
200 data (y-axis) and reported daily data (x-axis). Vertical and horizontal lines depict the 95% credible intervals and  
201 dotted lines show the threshold of  $R_t = 1$ . D & F) Correlation between the uncertainty in the weekly sliding (D)  
202 and daily (F)  $R_t$  estimates, defined as the width of the 95% credible intervals, using the reconstructed (y-axis)  
203 and reported (x-axis) daily data. The colour of the points in panels C-F correspond to the epidemic phase, i.e.  
204 the early (19<sup>th</sup> – 30<sup>th</sup> December for daily estimates, or 24<sup>th</sup> – 30<sup>th</sup> December for weekly sliding estimates),  
205 middle (31<sup>st</sup> December – 6<sup>th</sup> January) or late (7<sup>th</sup> – 14<sup>th</sup> January) phase of the data, shown by the strip in panel  
206 A. Solid lines show the linear model fit with 95% confidence intervals (grey shading). Dashed lines represent  
207 the  $x = y$  line.

208

209

210 *COVID-19 cases*

211

212 The reconstructed incidence of COVID-19 smoothed out intra-weekly variability, caused by factors such as  
213 weekend effects (Figure 3A & appendix pp7-8). Weekly sliding  $R_t$  estimates obtained from reconstructed and  
214 reported incidence were similar, both in their means ( $R^2 = 0.98$ ) and their level of uncertainty ( $R^2 = 0.99$ , Figure  
215 3C-D & appendix p4). Mean daily  $R_t$  estimates were less well correlated ( $R^2 = 0.67$ ), although the difference is

216 less marked than in the influenza case study (Figure 3E), and the uncertainty in the estimates was similar  
 217 across both approaches ( $R^2 = 0.97$ , Figure 3F). Most of the discrepant  $R_t$  estimates and higher levels of  
 218 uncertainty coincide with the early phase of the outbreak when incidence was lower (Figure 3E-F). Outside of  
 219 periods of low incidence, the largest differences in  $R_t$  estimates tended to correspond to time periods with  
 220 greater disparities between the reported and reconstructed incidence data (Figure 3B & appendix p5). The  
 221 overall agreement in the classification of  $R_t$  estimates was higher than for influenza, with 74.4% and 94.9%  
 222 agreement for daily and weekly sliding  $R_t$  estimates respectively (appendix p9).  
 223  
 224

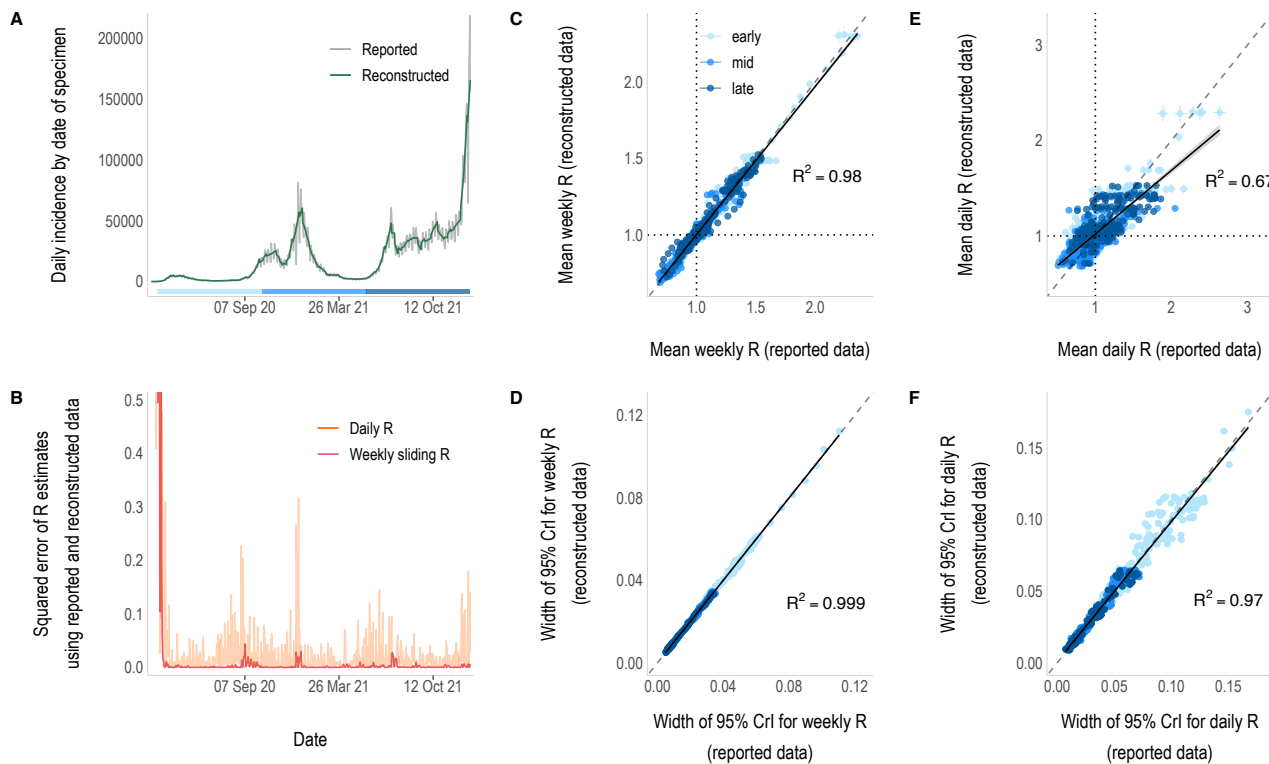

225  
 226  
 227 Figure 3.  $R_t$  estimates from daily incidence that was either reported or reconstructed from weekly aggregated  
 228 COVID-19 case data. A) The reported (grey) and reconstructed (green) daily incidence of COVID-19 by date of  
 229 specimen. B) Squared error of the daily (orange) and weekly sliding (pink)  $R_t$  estimates made from  
 230 reconstructed data compared to those obtained from the reported daily data.  $R_t$  estimation starts on the first  
 231 day of the second aggregation window (day 8 – 28<sup>th</sup> February 2020) and is plotted on the last day of the time  
 232 window used for estimation (i.e., starting on day 9 (29<sup>th</sup> February) for daily estimates and day 14 (5<sup>th</sup> March)  
 233 for weekly estimates). Note: the x-axis is shared with the incidence plot above and the y-axis has been limited  
 234 to 0.5 for clarity. C & E) Correlation between the weekly sliding (C) and daily (E) mean  $R_t$  estimates using  
 235 reconstructed (y-axis) and reported (x-axis) daily data, excluding the first 30 days due to low incidence. Vertical  
 236 and horizontal lines depict the 95% credible intervals and dotted lines show the threshold of  $R_t = 1$ . D & F)  
 237 Correlation between the uncertainty in the weekly sliding (D) and daily (F)  $R_t$  estimates, defined as the width  
 238 of the 95% credible intervals, using the reconstructed (y-axis) and reported (x-axis) daily data. The colour of  
 239 the points in panels C-F correspond to the epidemic phase, i.e. the early (21<sup>st</sup> March – 12<sup>th</sup> October 2020),  
 240 middle (13<sup>th</sup> October 2020 – 22<sup>nd</sup> May 2021) or late (23<sup>rd</sup> May – 30<sup>th</sup> December 2021) phase of the data, shown  
 241 by the strip in panel A. Solid lines show the linear model fit with 95% confidence intervals (grey shading).  
 242 Dashed lines represent the  $x = y$  line.

243

244 *COVID-19 deaths*

245

246 The reported incidence of COVID-19 deaths was much less influenced by day-to-day variation. The  
 247 reconstructed daily incidence was more similar to the observed daily data than in the previous case studies  
 248 (Figure 4A). Both weekly and daily  $R_t$  estimates obtained from weekly data were highly consistent with those  
 249 obtained from daily observations ( $R^2 = 0.98$  and  $R^2 = 0.80$  respectively, Figure 4C & 4E). The overall agreement  
 250 in  $R_t$  classifications for daily estimates was the highest of all case studies at 85.8%, and 93.3% for weekly  $R_t$   
 251 estimates (appendix p9). Discrepancies between the two mostly coincide with periods of particularly low  
 252 incidence of deaths (Figure 4B & appendix p7). The overall lower incidence of COVID-19 deaths compared to  
 253 COVID-19 cases means there is greater uncertainty in  $R_t$  estimates in this case study (Figure 4D, 4F & appendix  
 254 p6). However, there was minimal difference in the uncertainty of estimates obtained from daily and weekly  
 255 data (Figure 4D & 4F).  
 256

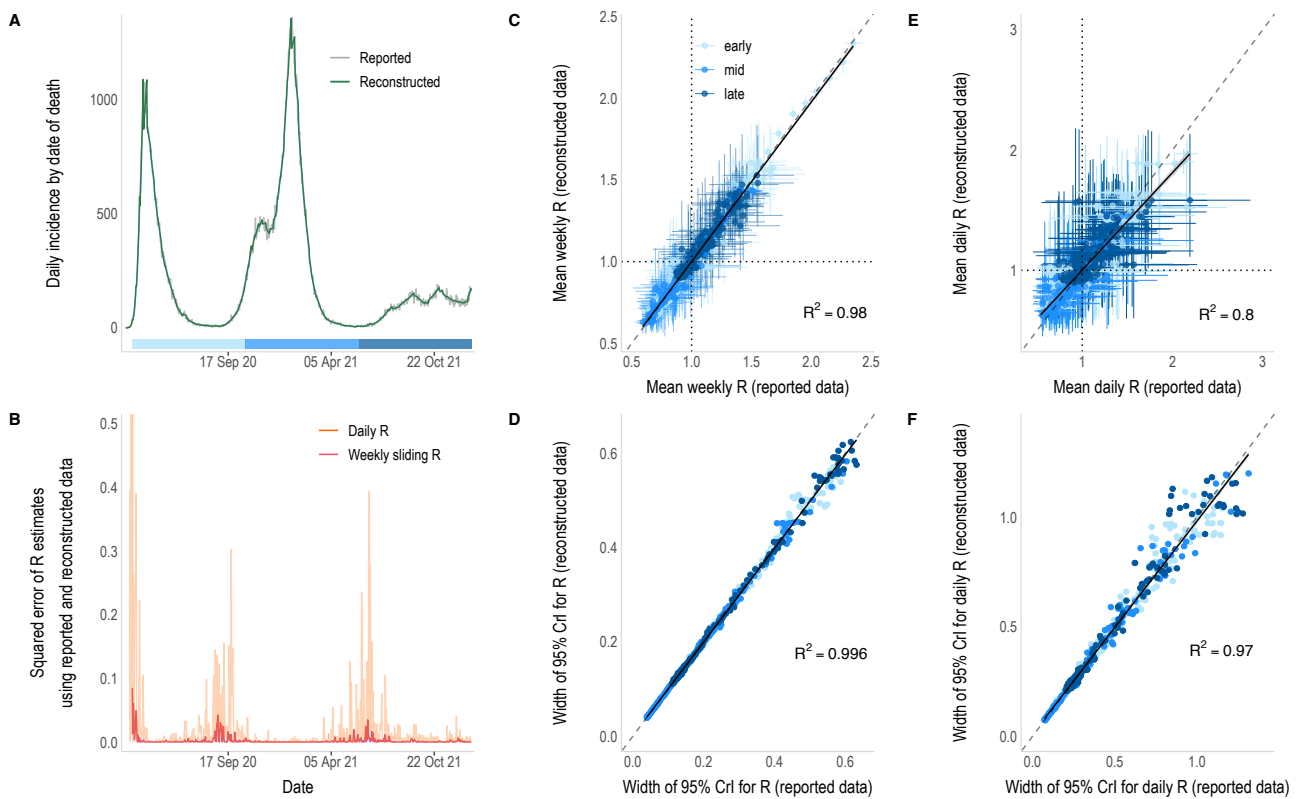

257

258

259 Figure 4.  $R_t$  estimates from daily incidence that was either reported or reconstructed from weekly aggregated  
 260 COVID-19 death data. A) The reported (grey) and reconstructed (green) daily incidence of COVID-19 by date  
 261 of death within 28 days of a positive test. B) Squared error of the daily (orange) and weekly sliding (pink)  $R_t$   
 262 estimates that were made from reconstructed data compared to those obtained from the reported daily data.  
 263  $R_t$  estimation starts on the first day of the second aggregation window (day 8 – 9<sup>th</sup> March 2020) and is plotted  
 264 on the last day of the time window used for estimation (i.e., starting on day 9 (10<sup>th</sup> March) for daily estimates  
 265 and day 14 (15<sup>th</sup> March) for weekly estimates). Note: the x-axis is shared with the incidence plot above and  
 266 the y-axis has been limited to 0.5 for clarity. C & E) Correlation between the weekly sliding (C) and daily (E)  
 267 mean  $R_t$  estimates using reconstructed (y-axis) and reported daily data (x-axis), excluding the first 30 days due  
 268 to low incidence. Vertical and horizontal lines depict the 95% credible intervals and dotted lines show the



269 threshold of  $R_t = 1$ . D & F) Correlation between the uncertainty in the weekly sliding (D) and daily (F)  $R_t$   
270 estimates, defined as the width of the 95% credible intervals, using the reconstructed (y-axis) and reported  
271 daily (x-axis) data. The colour of the points in panels C-F correspond to the epidemic phase, i.e. the early (31<sup>st</sup>  
272 March - 20<sup>th</sup> October 2020), middle (21<sup>st</sup> October 2020 – 28<sup>th</sup> May 2021) or late (29<sup>th</sup> May 2021 – 2<sup>nd</sup> January  
273 2022) phase of the data, shown by the strip in panel A. Solid lines show the linear model fit with 95%  
274 confidence intervals (grey shading). Dashed lines represent the  $x = y$  line.

275  
276 In all case-studies, incidence reconstructions converged within 10 iterations of the EM algorithm. The overall  
277 process of  $R_t$  estimation from weekly aggregated data took three seconds or less to run on MacOS (2 GHz  
278 Quad-Core Intel Core i5) 16GB RAM (appendix p10); the influenza scenario, with over 57,000 cases, took two  
279 seconds to run, whilst the COVID-19 cases and deaths scenarios, with an overall incidence over 149,000 and  
280 13 million cases respectively, took three seconds to run.

281  
282 *Simulation study*

283  
284 The method performed well across all scenarios, successfully estimating  $R_t$  from the aggregated simulated  
285 data (appendix pp10-20). Convergence of the EM algorithm was quick, with negligible differences in the  
286 reconstructed incidence beyond 5 iterations (appendix p22).

287  
288 When introducing weekend effects into simulated data,  $R_t$  estimates from reconstructed incidence were more  
289 successful at recovering the true value of  $R_t$  than when using reported incidence (appendix p21). The method  
290 can also be successfully applied to other temporal aggregations of data, e.g. three-, ten- or fourteen-day  
291 windows (appendix pp22-24).

292  
293 Discussion

294  
295 Estimates of the time-varying reproduction number ( $R_t$ ) have frequently been used to inform and guide  
296 policymaking during outbreaks, and a commonly used approach to estimate  $R_t$  is EpiEstim, which relies on  
297 daily incidence data. However, maintaining daily incidence databases requires substantial time and  
298 investment in resources, which is not always feasible, particularly for less acute or routinely reported diseases.  
299 Therefore, in practice, many diseases are not reported on a daily basis, including influenza and other notifiable  
300 diseases in the UK and US.<sup>2-5</sup> As the COVID-19 pandemic persists, daily reporting is also becoming less  
301 common.<sup>21</sup> Coarsely aggregated data can be challenging to deal with in the context of  $R_t$  estimation methods,  
302 restricting their applications in certain contexts. In this study, we develop a statistical framework and tool that  
303 allows  $R_t$  estimation from aggregated incidence without introducing bias. Using influenza and COVID-19 data,  
304 alongside a simulation study, we demonstrate how a simple expectation-maximisation algorithm approach  
305 can rapidly reconstruct daily incidence data and accurately estimate  $R_t$ .

306  
307 In all case studies, direct comparisons between weekly sliding  $R_t$  estimates show that very similar estimates  
308 can be made from the reported daily incidence and the reconstructed daily incidence from weekly aggregated  
309 data. However, daily  $R_t$  estimates are more influenced by noise, such as intra-weekly variability, leading to  
310 greater disparities in estimates between datasets. There are clear weekend effects exhibited in the influenza  
311 and COVID-19 case data (appendix p8), leading to peaks and troughs in the reported incidence and the  
312 resulting daily  $R_t$  estimates (Figures 2 & 3, appendix pp2&4). Using reconstructed incidence considerably  
313 smoothed the daily  $R_t$  estimates, removing the impact of weekend-effects. The overall agreement in the

314 classification of  $R_t$  as increasing, uncertain, or declining between estimates made from each dataset rose  
315 substantially when some of the variability in the reported data was smoothed by estimating  $R_t$  using weekly  
316 sliding windows (appendix pp8-9).

317  
318 Despite both being affected by weekly periodicity in reporting, concordance of  $R_t$  estimates obtained from  
319 COVID-19 case data is considerably better than for influenza, perhaps due to the greater quantity of data, with  
320 a very strong positive correlation between daily and weekly  $R_t$  estimates (Figure 3). This is reflected in the high  
321 overall agreement in the classification of  $R_t$  estimates obtained from the reported and reconstructed datasets.  
322 It is important to note that outlying and much larger  $R_t$  estimates obtained from both datasets coincide with  
323 the early phase of the epidemic, when incidence was lower and the prior for  $R_t$  ( $\mu=5$ ,  $\sigma=5$ ) had more weight  
324 on estimates.

325  
326 During the early stages of epidemics, despite there being far fewer deaths than cases, death data can  
327 sometimes be considered more reliable.<sup>22,23</sup> For example, case reporting is affected by surveillance system  
328 quality and the robustness of testing practices, which can vary considerably over the course of an epidemic,  
329 especially early on. COVID-19 incidence by date of death is much less influenced by administrative noise in the  
330 data (appendix p8), and the reconstructed incidence is most similar to the reported daily incidence of any case  
331 study. Therefore, the greatest differences in  $R_t$  estimates from death data coincide with periods of low  
332 incidence (appendix p7) when uncertainty increases. Weekly sliding  $R_t$  estimates are equally as correlated as  
333 those from COVID-19 case data, but daily  $R_t$  estimates are the most strongly correlated of any dataset (Figure  
334 4). Additionally, there is very high overall agreement in the classification of daily and weekly  $R_t$  (appendix p9).  
335 This provides further support that differences between daily  $R_t$  estimates for influenza and COVID-19 cases is  
336 likely due to the reconstructed incidence smoothing out weekly periodicity in reporting.

337  
338 To investigate further, weekend effects were artificially introduced to data in the simulation study (appendix  
339 p21). We have shown that, when using reported incidence,  $R_t$  estimates are all strongly influenced by weekend  
340 effects (regardless of the smoothing time-window). Reconstructing daily incidence from weekly data  
341 completely removes the effect of noise from resulting  $R_t$  values, greatly improving the accuracy of estimates.  
342 This demonstrates that it may be beneficial to artificially aggregate daily data, as has been done in previous  
343 studies.<sup>6,7</sup> However, we did assume quite an extreme level of administrative noise, so in instances where the  
344 pattern is less prominent, it may have less of an impact on estimates. Disentangling important temporal trends  
345 in  $R_t$  from noise in the data can be difficult, and if aggregated data is used it will be at the cost of reduced  
346 temporal resolution in  $R_t$  estimates.

347  
348 This can be seen when the method is applied to data aggregated over longer timescales, such as ten- to  
349 fourteen-days (appendix pp22-24). This approach requires two layers of smoothing: 1) the incidence is  
350 smoothed over each aggregation window during the reconstruction process and 2)  $R_t$  estimates are smoothed  
351 by the sliding window chosen by the user. If a change in  $R_t$  occurs at the end of an aggregation window (i.e. on  
352 the last day), such as a sudden decrease in  $R_t$  due to a strict lockdown, that change is detected with a lag,  
353 corresponding to the length of the sliding window used for  $R_t$  estimation (appendix p23). However, if the event  
354 occurs mid-aggregation window, then in addition to the usual lag caused by the sliding window, estimates will  
355 be affected by the smoothing of the incidence within the aggregation window during reconstruction (appendix  
356 p24). The change in  $R_t$  will seem more gradual over the period that data are aggregated over and will appear  
357 to start earlier than in reality (corresponding to the first day of the aggregation window). It is important for  
358 users to keep this in mind, particularly when using longer aggregations of data.

359

360 Another consideration is that the reconstructed incidence can have discontinuities in the borders between  
361 aggregation windows (appendix pp11-12). This occurs because in reconstructing daily incidence we impose  
362 that, if it were to be re-aggregated, it would match the original data. Methods that simply fit smoothing splines  
363 to weekly data, inferring daily case counts from the daily difference in cumulative counts, are not affected by  
364 this.<sup>24,25</sup> To circumvent this problem, we recommend that sliding windows used to estimate  $R_t$  are at least  
365 equal to or longer than the length of aggregation windows to reduce the impact of discontinuities on estimates  
366 (appendix pp22-24).

367

368 Alternative approaches include modelling frameworks implemented in the Epidemia and EpiNow2 R  
369 packages.<sup>6,22,26</sup> Daily infections are modelled as a latent process, back-calculated from observed data on cases  
370 or deaths, depending on an appropriate infection to observation distribution. In addition, Epidemia integrates  
371 further information, such as the infection ascertainment rate (for cases) or the infection fatality rate (for  
372 deaths).<sup>22</sup> This facilitates a ‘nowcasting’ approach, allowing users to estimate  $R_t$  directly from the unobserved  
373 infections, but they typically require more data (e.g. incidence of deaths and cases), more assumptions (e.g.  
374 delay distributions and ascertainment rates), and are much more computationally intensive, which can be a  
375 barrier to the adoption of such methods by users.<sup>14</sup>

376

377 Here,  $R_t$  estimates are based on a single daily incidence reconstruction, meaning  $R_t$  can be estimated very  
378 rapidly from aggregated data, which is particularly desirable during real-time outbreak analysis.<sup>14</sup> A potential  
379 downside is that uncertainty in  $R_t$  estimates could be underestimated. However, the simulation study showed  
380 that the 95% credible interval of estimates encompassed the correct value of  $R_t$  the majority of the time, and  
381 we found no substantial indication that this approach detrimentally affected our characterisation of the  
382 uncertainty.

383

384 Given that this method is directly derived from EpiEstim, it relies on similar assumptions and caveats.<sup>15,27</sup> As  
385 time of infection is more difficult to observe than symptom onset, the SI is typically used as an approximation  
386 of the generation time in the renewal equation, which may introduce bias.<sup>28</sup> The SI, the level of undetected  
387 cases, and the reporting rate are assumed to remain constant, which is often not the case in practice. Factors  
388 such as changes in population immunity, and the introduction of interventions, can alter the SI throughout an  
389 epidemic.<sup>29</sup> Whilst changing case definitions, new testing practices, and increased healthcare-seeking  
390 behaviour, can all affect case ascertainment.<sup>15</sup> Parameters chosen by users can also influence estimation  
391 accuracy, for instance, the time window length for temporal smoothing and the prior for  $R_t$ .<sup>27</sup>

392

393 To make the method simple to implement for current and future users of EpiEstim, this extension has been  
394 fully integrated with the ‘estimate\_R()’ function in the original R package on github.<sup>30</sup> Just one additional  
395 parameter is required – the number of days data are aggregated over (with some other optional parameters).  
396 More details regarding the applications of this method can be found in the package vignette and associated  
397 examples.<sup>30</sup>

398

399 Conclusion

400

401 We extended the widely used  $R_t$  estimation approach proposed by Cori et al.,<sup>15</sup> and implemented in the R  
402 package EpiEstim, to incorporate a new feature which allows  $R_t$  to be easily estimated from any temporal  
403 aggregation of incidence data. We have demonstrated that the method performs well using both simulated

404 and real-world data, recovering or even improving upon the estimates that would have been made from  
405 reported daily data. This extension is easy to use and computationally efficient, which will enable  
406 epidemiologists and other public health professionals to apply EpiEstim to a wider range of diseases and  
407 epidemic contexts.

408

409

- 410 1. Baker RE, Mahmud AS, Miller IF, Rajeev M, Rasambainarivo F, Rice BL, et al. Infectious disease in an era  
411 of global change. *Nat Rev Microbiol*. 2022 Apr;20(4):193–205.
- 412 2. National flu and COVID-19 surveillance reports: 2021 to 2022 season [Internet]. GOV.UK. [cited 2022 Jun  
413 27]. Available from: [https://www.gov.uk/government/statistics/national-flu-and-covid-19-surveillance-](https://www.gov.uk/government/statistics/national-flu-and-covid-19-surveillance-reports-2021-to-2022-season)  
414 [reports-2021-to-2022-season](https://www.gov.uk/government/statistics/national-flu-and-covid-19-surveillance-reports-2021-to-2022-season)
- 415 3. Pacheco O, Beltrán M, Nelson CA, Valencia D, Tolosa N, Farr SL, et al. Zika Virus Disease in Colombia —  
416 Preliminary Report. *New England Journal of Medicine*. 2020 Aug 6;383(6):e44.
- 417 4. Notifiable diseases: weekly reports for 2022 [Internet]. GOV.UK. [cited 2022 Jun 27]. Available from:  
418 <https://www.gov.uk/government/publications/notifiable-diseases-weekly-reports-for-2022>
- 419 5. Notifiable Infectious Disease Tables | CDC [Internet]. 2021 [cited 2022 Jul 2]. Available from:  
420 <https://www.cdc.gov/nndss/data-statistics/infectious-tables/index.html>
- 421 6. Mishra S, Scott J, Zhu H, Ferguson NM, Bhatt S, Flaxman S, et al. A COVID-19 Model for Local Authorities  
422 of the United Kingdom [Internet]. medRxiv; 2020 [cited 2022 Jul 1]. p. 2020.11.24.20236661. Available  
423 from: <https://www.medrxiv.org/content/10.1101/2020.11.24.20236661v1>
- 424 7. Role of Data Aggregation in Biosurveillance Detection Strategies with Applications from ESSENCE  
425 [Internet]. [cited 2022 Jul 2]. Available from:  
426 <https://www.cdc.gov/mmwr/preview/mmwrhtml/su5301a16.htm>
- 427 8. Ferguson NM, Cucunubá ZM, Dorigatti I, Nedjati-Gilani GL, Donnelly CA, Basáñez MG, et al. Countering  
428 the zika epidemic in latin america. *Science*. 2016;353(6297):353–4.
- 429 9. Charniga K, Cucunubá ZM, Mercado M, Prieto F, Ospina M, Nouvellet P, et al. Spatial and temporal  
430 invasion dynamics of the 2014–2017 Zika and chikungunya epidemics in Colombia. *PLOS Computational*  
431 *Biology*. 2021 Jul 2;17(7):e1009174.
- 432 10. Cowling BJ, Fang VJ, Riley S, Peiris JSM, Leung GM. Estimation of the serial interval of influenza.  
433 *Epidemiology*. 2009 May;20(3):344–7.
- 434 11. White LF, Wallinga J, Finelli L, Reed C, Riley S, Lipsitch M, et al. Estimation of the reproductive number  
435 and the serial interval in early phase of the 2009 influenza A/H1N1 pandemic in the USA. *Influenza and*  
436 *Other Respiratory Viruses*. 2009;3(6):267–76.
- 437 12. Bi Q, Wu Y, Mei S, Ye C, Zou X, Zhang Z, et al. Epidemiology and transmission of COVID-19 in 391 cases  
438 and 1286 of their close contacts in Shenzhen, China: a retrospective cohort study. *The Lancet Infectious*  
439 *Diseases*. 2020 Aug 1;20(8):911–9.
- 440 13. Rai B, Shukla A, Dwivedi LK. Estimates of serial interval for COVID-19: A systematic review and meta-  
441 analysis. *Clin Epidemiol Glob Health*. 2021;9:157–61.

- 442 14. Nash RK, Nouvellet P, Cori A. Real-time estimation of the epidemic reproduction number: Scoping  
443 review of the applications and challenges. *PLOS Digital Health*. 2022 Jun 27;1(6):e0000052.
- 444 15. Cori A, Ferguson NM, Fraser C, Cauchemez S. A New Framework and Software to Estimate Time-Varying  
445 Reproduction Numbers During Epidemics. *Am J Epidemiol*. 2013 Nov 1;178(9):1505–12.
- 446 16. Cori [aut A, cre, Cauchemez S, Ferguson NM, Fraser C, Dahlgvist E, et al. EpiEstim: Estimate Time  
447 Varying Reproduction Numbers from Epidemic Curves [Internet]. 2021 [cited 2022 Jun 9]. Available  
448 from: <https://CRAN.R-project.org/package=EpiEstim>
- 449 17. Wallinga J, Lipsitch M. How generation intervals shape the relationship between growth rates and  
450 reproductive numbers. *Proceedings of the Royal Society B: Biological Sciences*. 2007 Feb  
451 22;274(1609):599–604.
- 452 18. Riley P, Cost AA, Riley S. Intra-Weekly Variations of Influenza-Like Illness in Military Populations. *Military  
453 Medicine*. 2016 Apr 1;181(4):364–8.
- 454 19. Cases in the UK | Coronavirus in the UK [Internet]. [cited 2022 Jan 9]. Available from:  
455 <https://coronavirus.data.gov.uk/details/cases>
- 456 20. Jombart T, Nouvellet P, Bhatia S, Kamvar ZN, Taylor T, Ghazzi S. projections: Project Future Case  
457 Incidence [Internet]. 2021 [cited 2022 Jun 9]. Available from: [https://CRAN.R-  
458 project.org/package=projections](https://CRAN.R-project.org/package=projections)
- 459 21. CSSEGISandData. COVID-19 Data Repository by the Center for Systems Science and Engineering (CSSE) at  
460 Johns Hopkins University [Internet]. 2022 [cited 2022 Jul 5]. Available from:  
461 <https://github.com/CSSEGISandData/COVID-19>
- 462 22. Flaxman S, Mishra S, Gandy A, Unwin HJT, Mellan TA, Coupland H, et al. Estimating the effects of non-  
463 pharmaceutical interventions on COVID-19 in Europe. *Nature*. 2020;584(7820):257–61.
- 464 23. Nouvellet P, Bhatia S, Cori A, Ainslie KEC, Baguelin M, Bhatt S, et al. Reduction in mobility and COVID-19  
465 transmission. *Nat Commun*. 2021 Feb 17;12(1):1090.
- 466 24. Yamauchi T, Takeuchi S, Yamano Y, Kuroda Y, Nakadate T. Estimation of the effective reproduction  
467 number of influenza based on weekly reports in Miyazaki Prefecture. *Scientific reports*. 2019;9(1):1–9.
- 468 25. Nishiura H, Chowell G. Early transmission dynamics of Ebola virus disease (EVD), West Africa, March to  
469 August 2014. *Eurosurveillance*. 2014 Sep 11;19(36):20894.
- 470 26. Abbott S, Hellewell J, Thompson RN, Sherratt K, Gibbs HP, Bosse NI, et al. Estimating the time-varying  
471 reproduction number of SARS-CoV-2 using national and subnational case counts. *Wellcome Open Res*.  
472 2020 Jun 1;5:112.
- 473 27. Gostic KM, McGough L, Baskerville EB, Abbott S, Joshi K, Tedijanto C, et al. Practical considerations for  
474 measuring the effective reproductive number, Rt. *PLOS Computational Biology*. 2020 Dec  
475 10;16(12):e1008409.
- 476 28. Britton T, Scalia Tomba G. Estimation in emerging epidemics: biases and remedies. *Journal of The Royal  
477 Society Interface*. 2019 Jan 31;16(150):20180670.
- 478 29. Ali ST, Wang L, Lau EHY, Xu XK, Du Z, Wu Y, et al. Serial interval of SARS-CoV-2 was shortened over time  
479 by nonpharmaceutical interventions. *Science*. 2020 Aug 28;369(6507):1106–9.

- 480 30. mrc-ide/EpiEstim: A tool to estimate time varying instantaneous reproduction number during epidemics  
481 [Internet]. [cited 2022 Aug 9]. Available from: <https://github.com/mrc-ide/EpiEstim>  
482
